# Supplementary material for: Albumin Might Attenuate Bacteria-Induced Damage on Kupffer Cells for Patients with Chronic Liver Disease
Source: MDPI journal article supplement (doi:10.3390/cells10092298), 2021-09-03
Supplement: s1 [file s1]

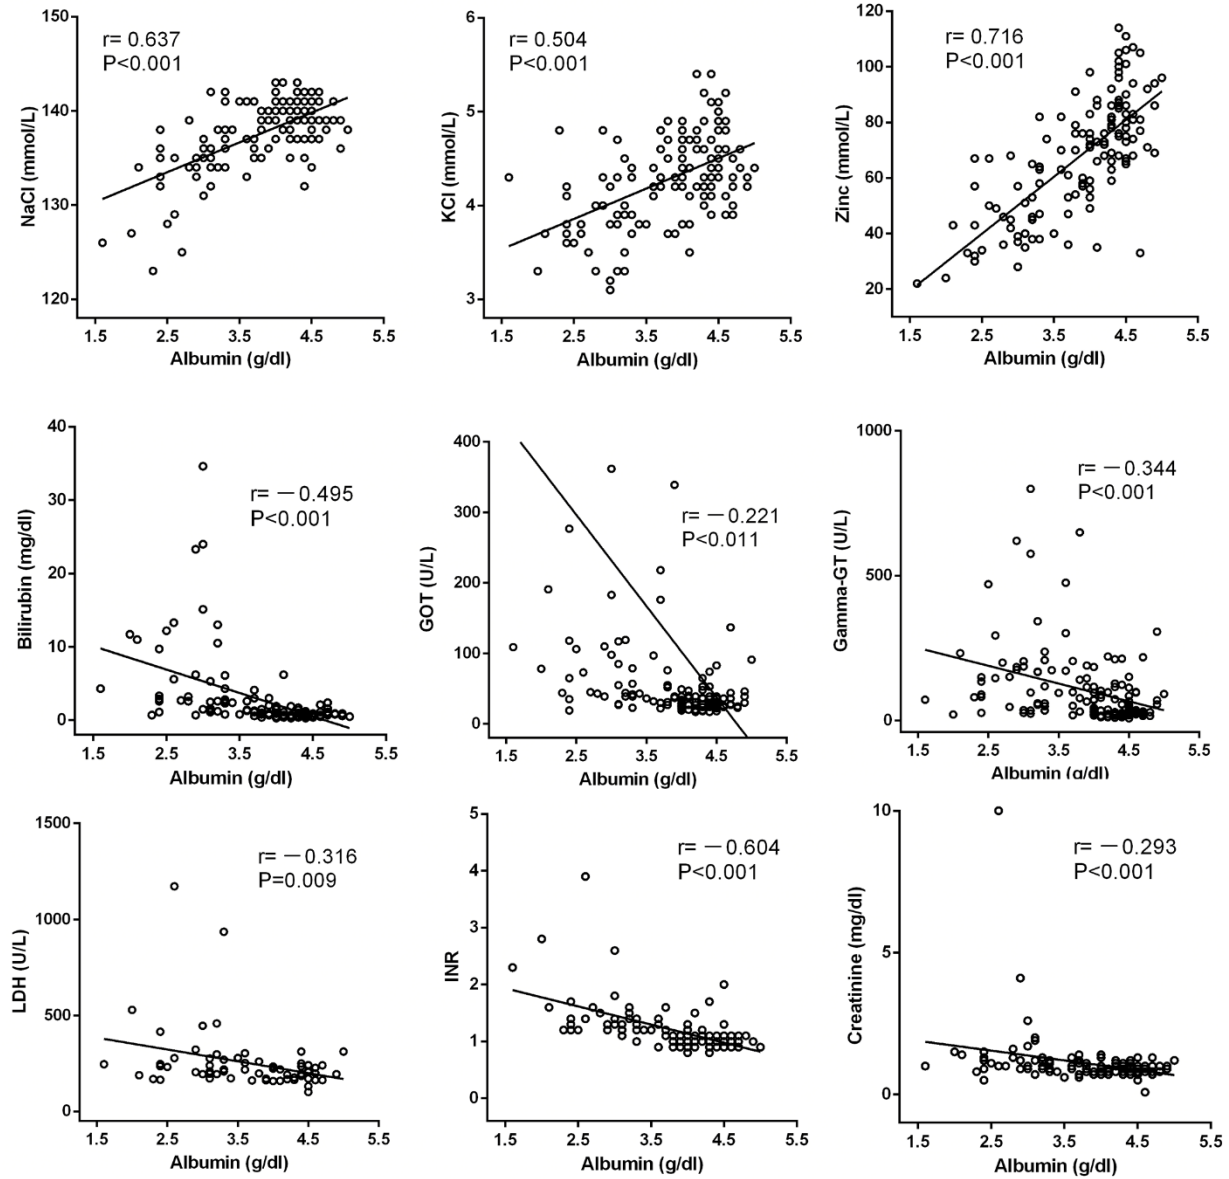

**Figure S1: Correlation between albumin and various clinical characteristics.** The NaCl, KCl, and Zinc levels positively correlated with albumin levels while bilirubin, GOT, Gamma-GT, LDH, INR, and creatinine negatively correlated with albumin levels in patients with CLDs.
